# Supplementary material for: Synthesis and Biological Activity of Unsymmetrical Monoterpenylhetaryl Disulfides
Source: MDPI journal article supplement (doi:10.3390/molecules27165101), 2022-08-10

# **Molecules**

## **Supplementary Materials**

### **Synthesis and biological activity of unsymmetrical monoterpenylhetaryl disulfides**

Denis V. Sudarikov\*, Yulia V. Gyrdaymova, Alexander V. Borisov,  
Julia M. Lukiyanova, Roman V. Rummyantsev, Oksana G.  
Shevchenko, Diana R. Baidamshina, Nargiza D Zakarova, Airat R.  
Kayumov, Ekaterina O. Sinegubova, Aleksandrina S. Volobueva,  
Vladimir V. Zarubaev, Svetlana A. Rubtsova

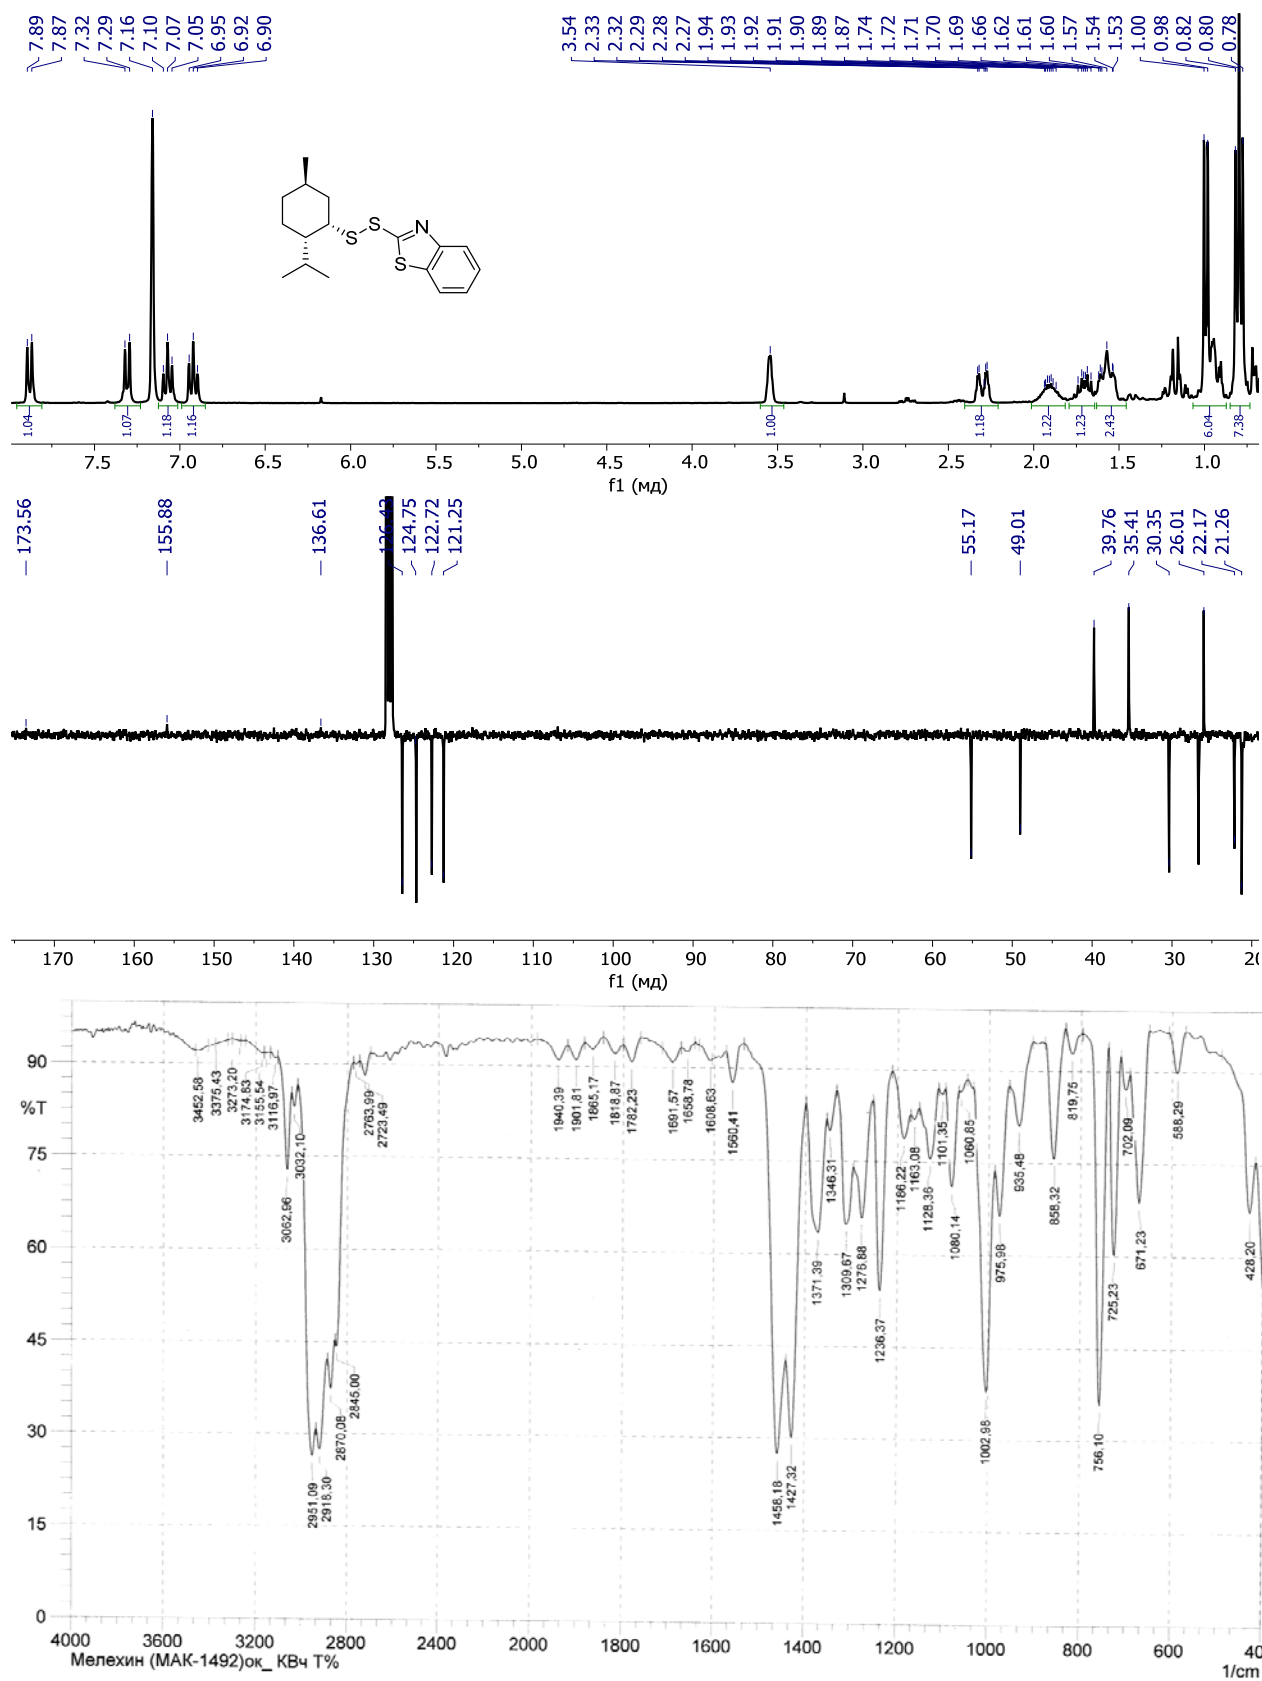

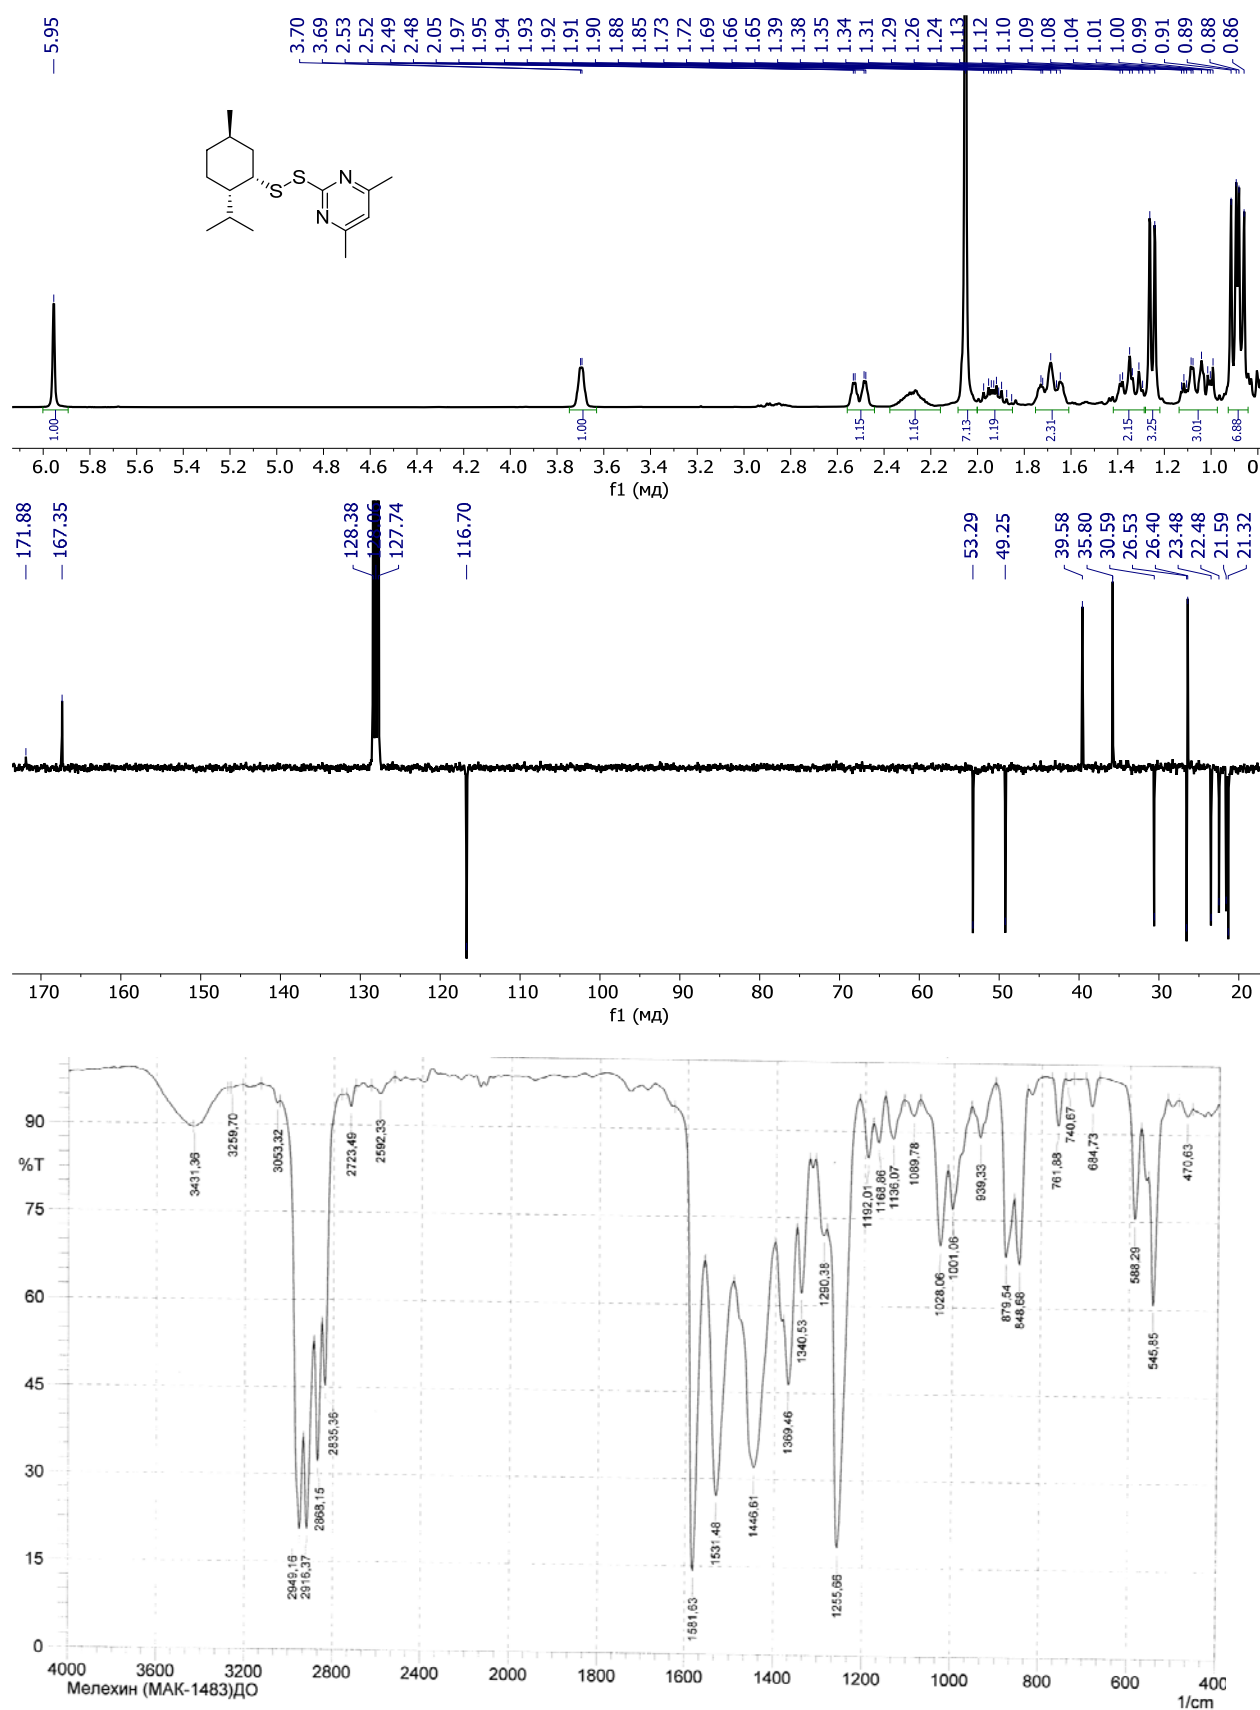

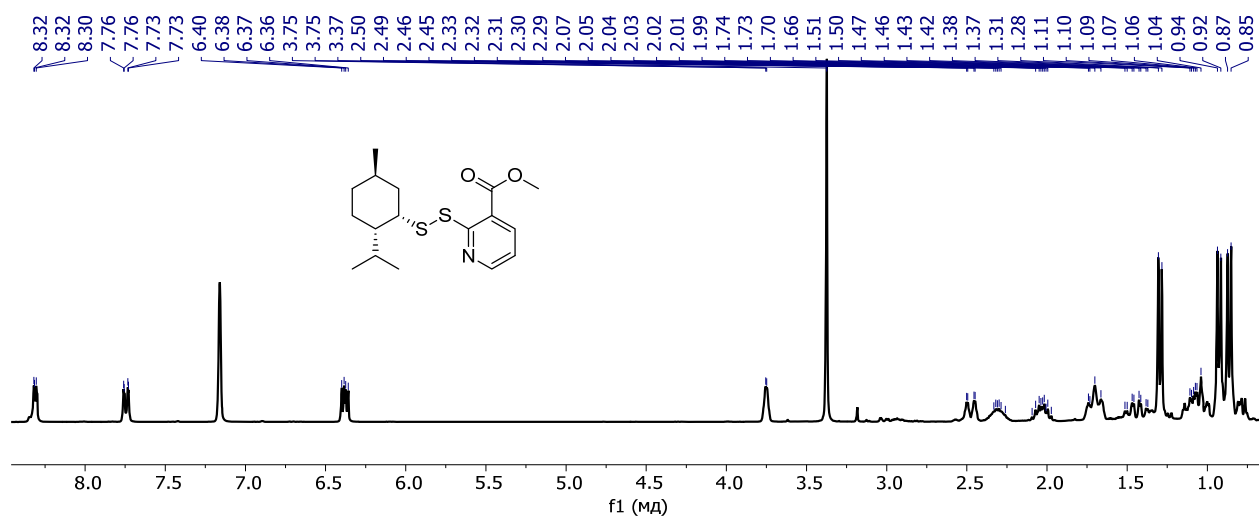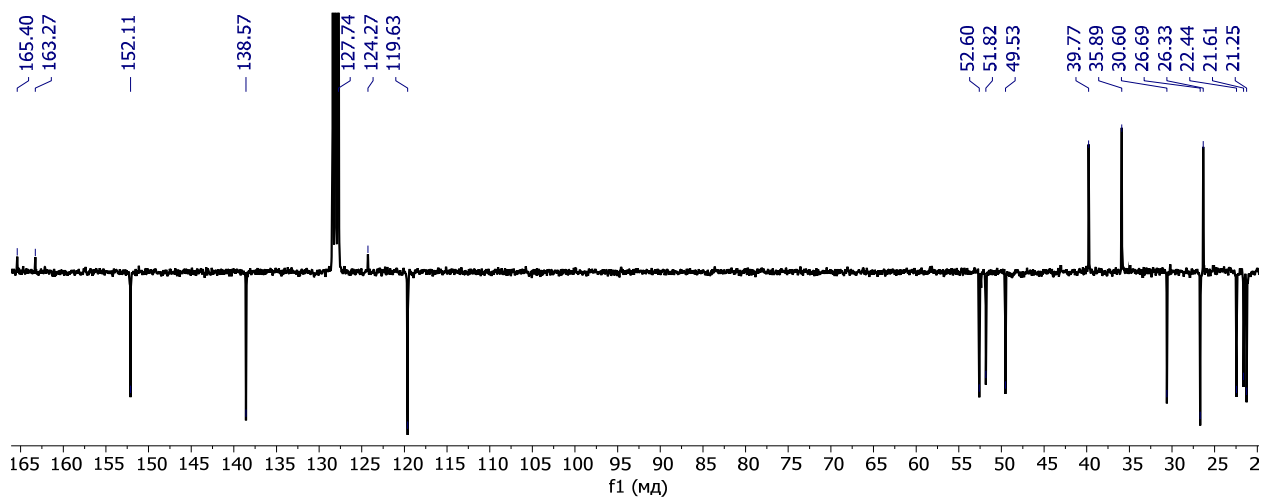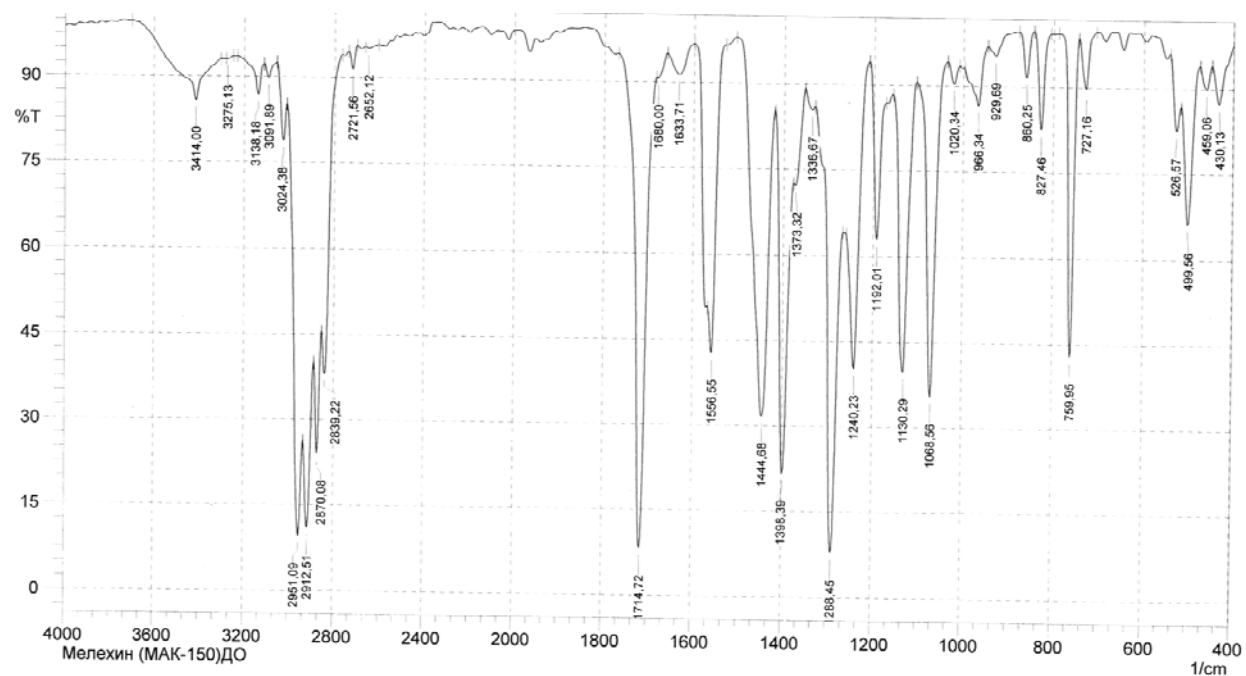

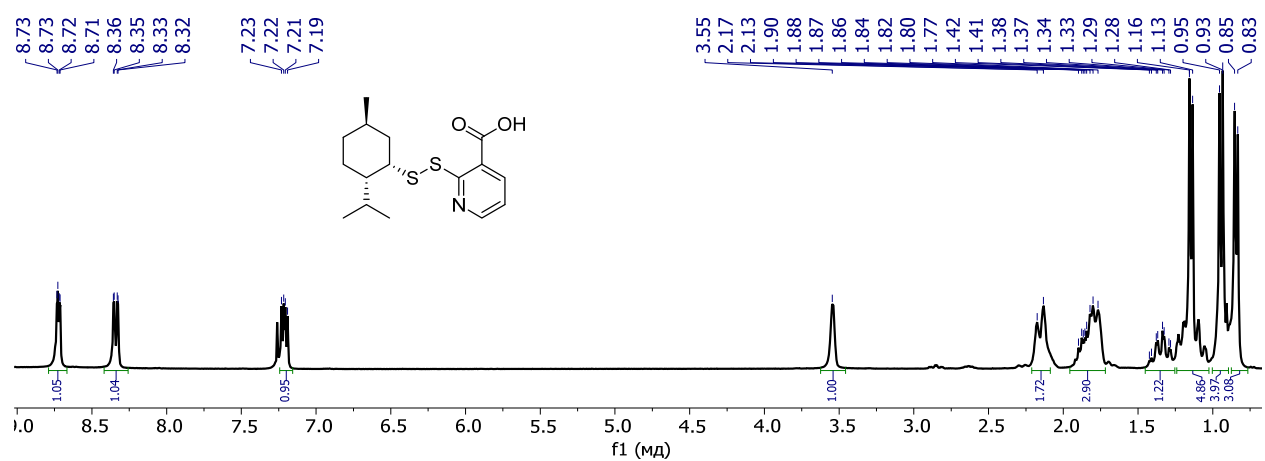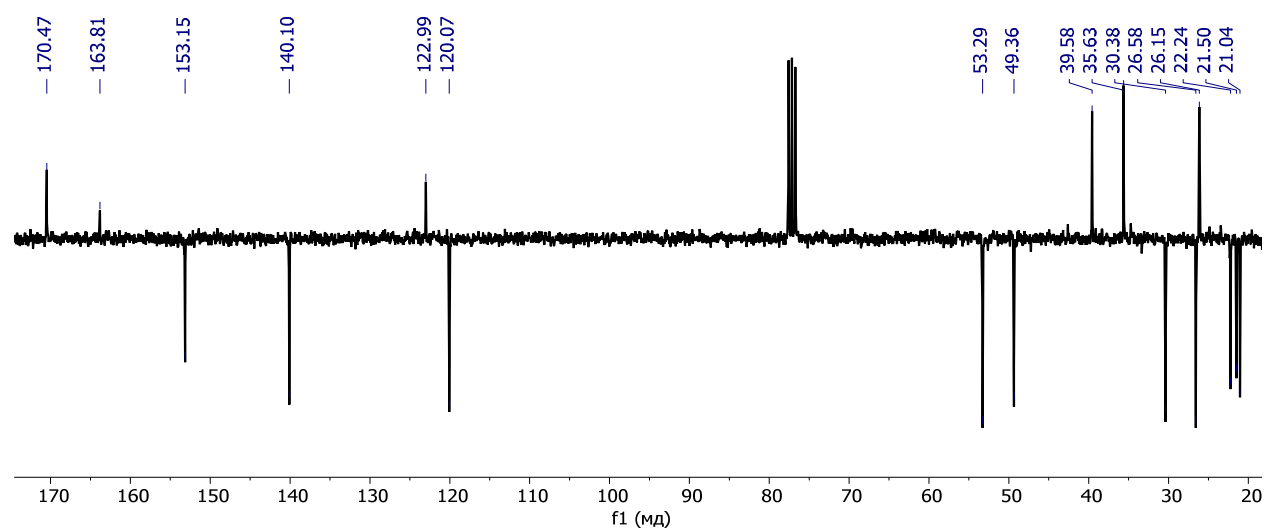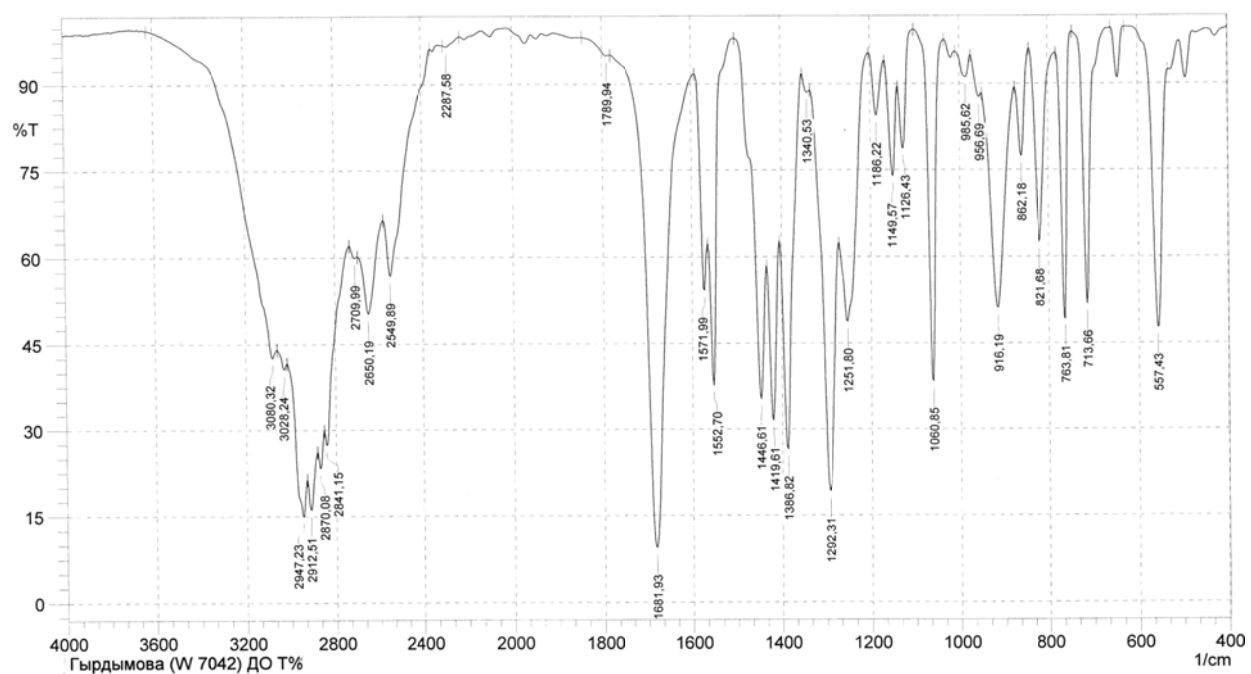

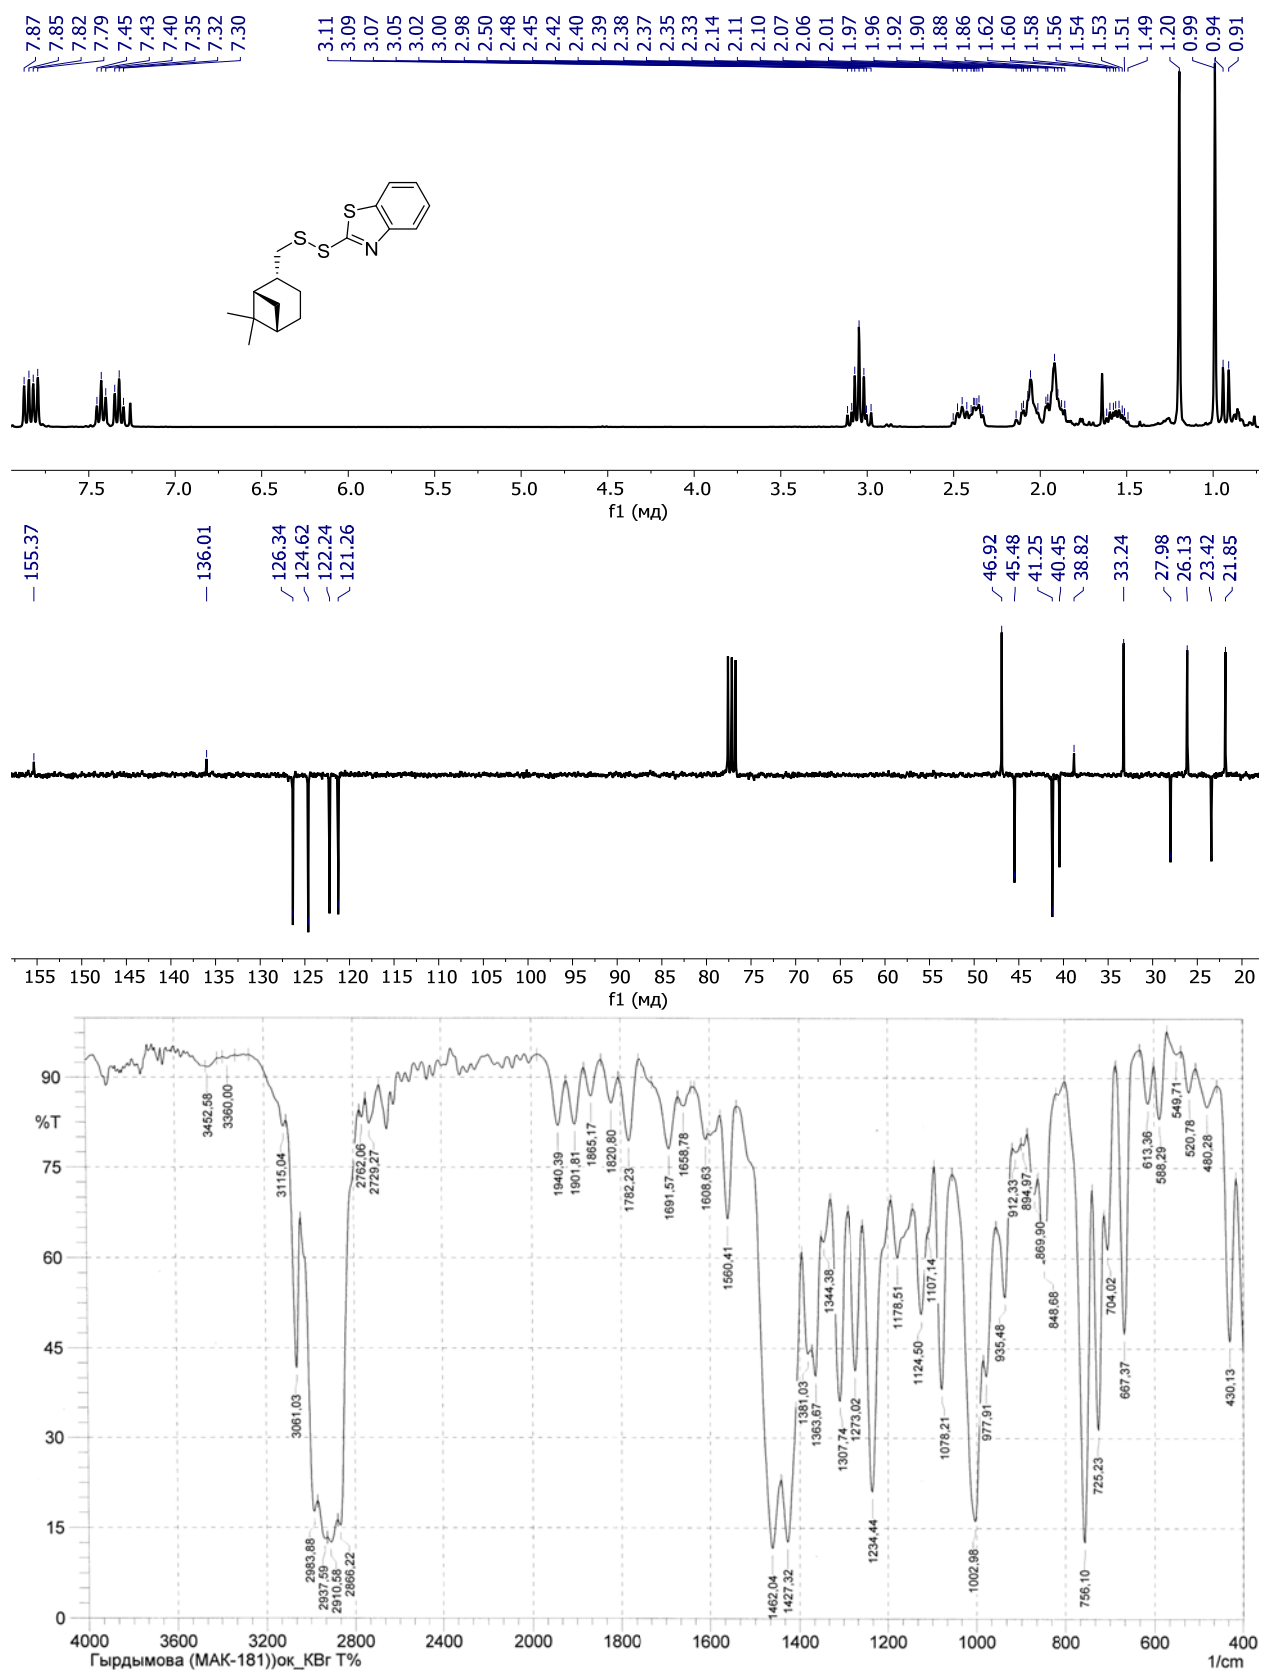

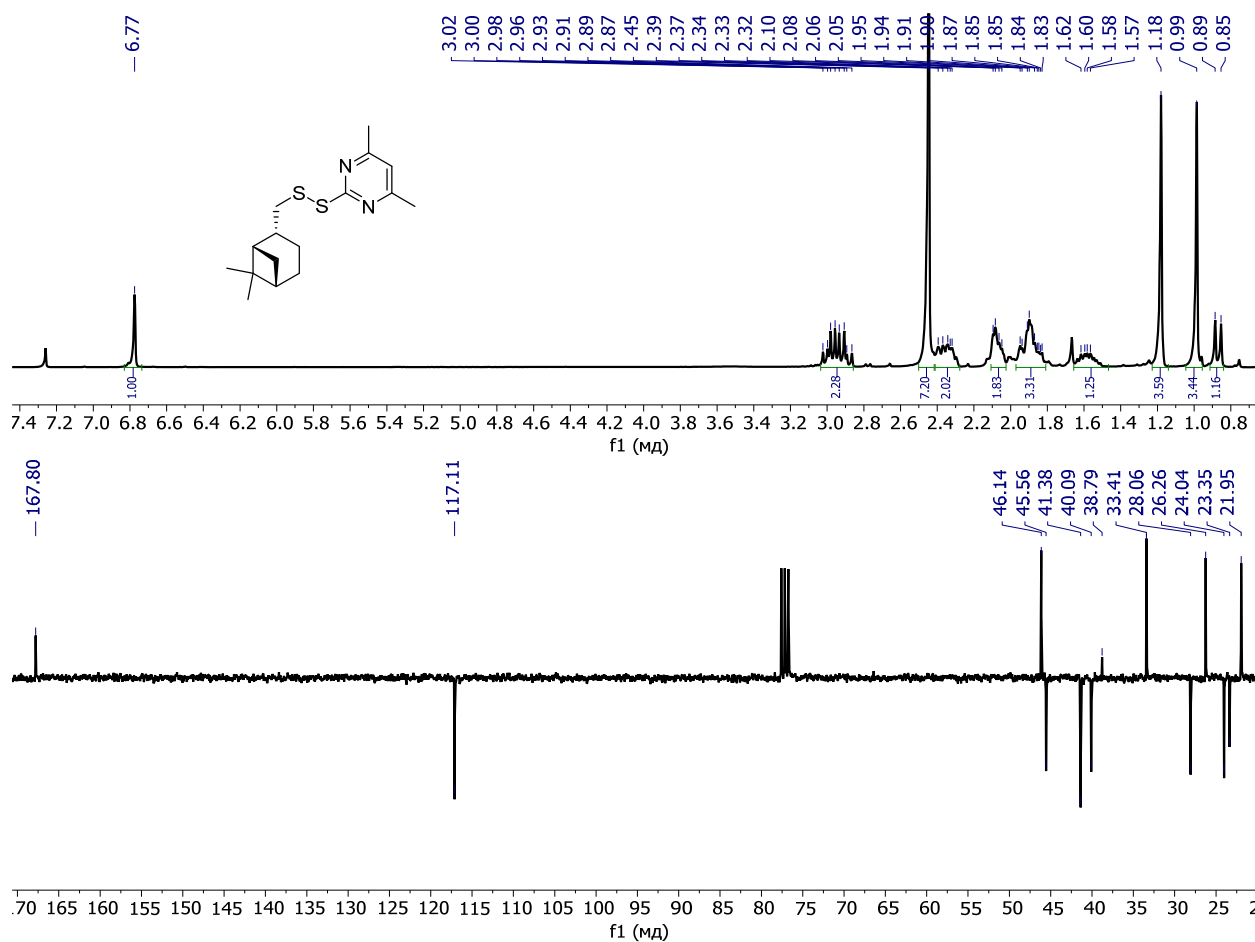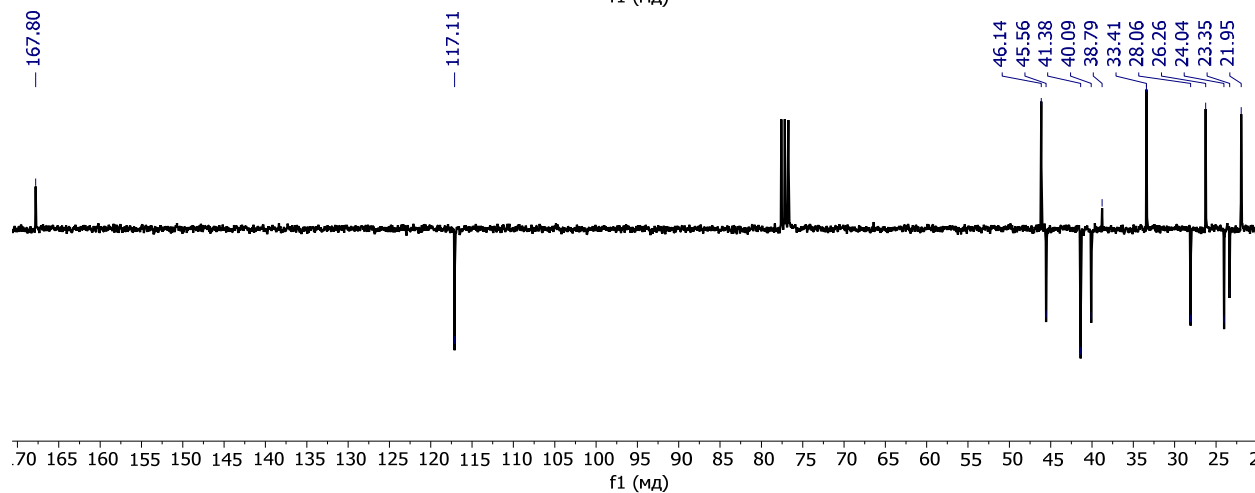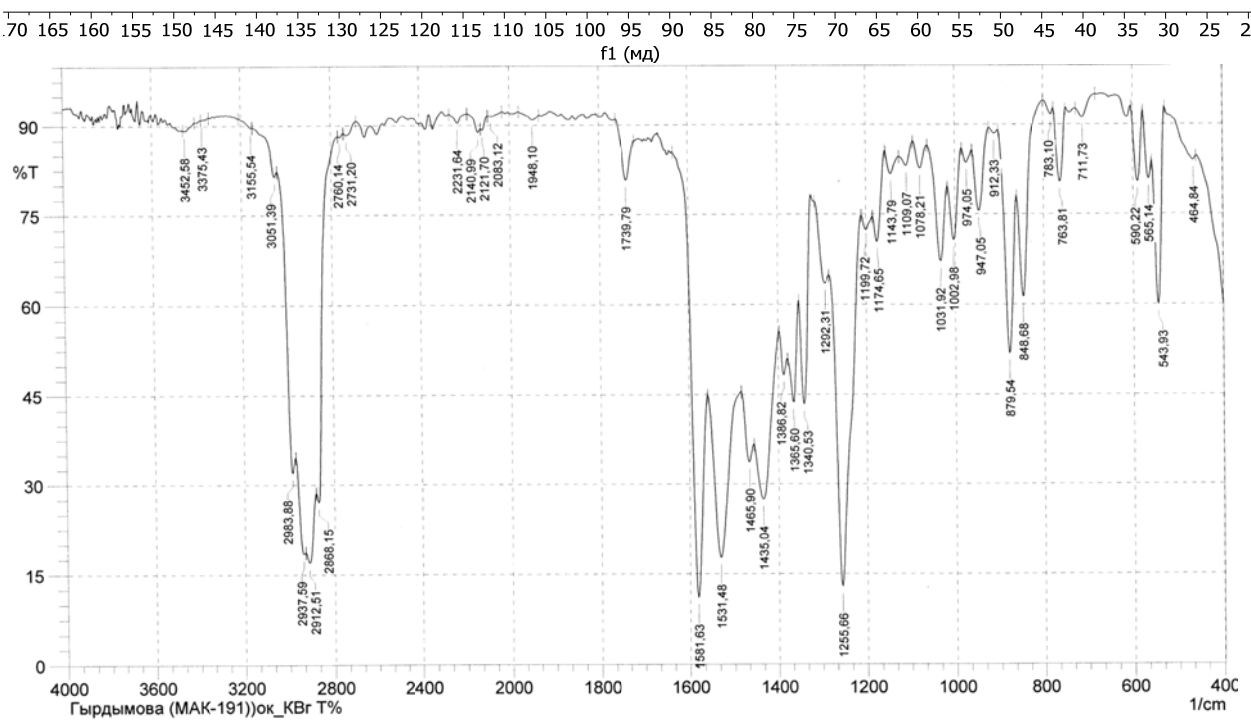

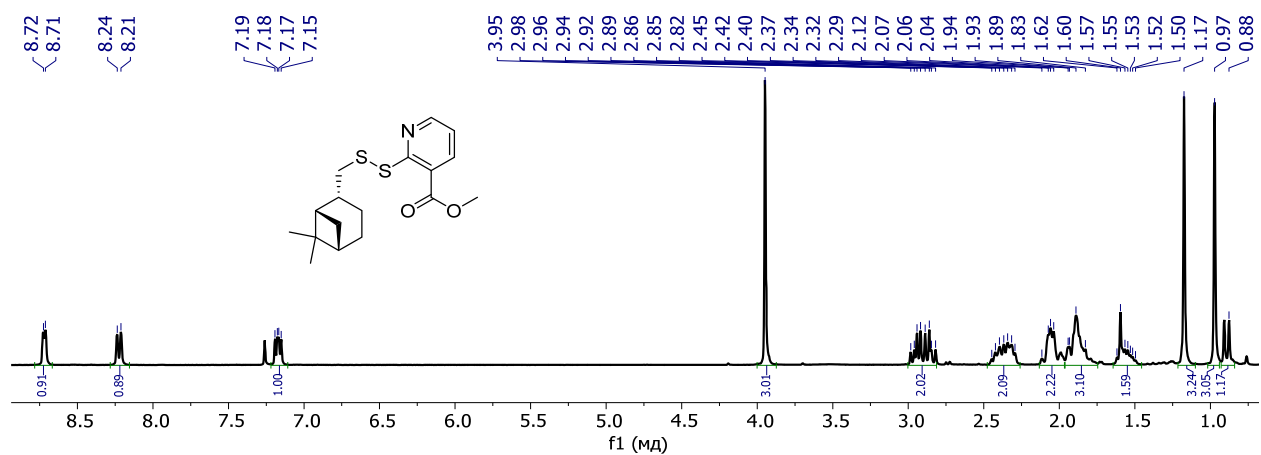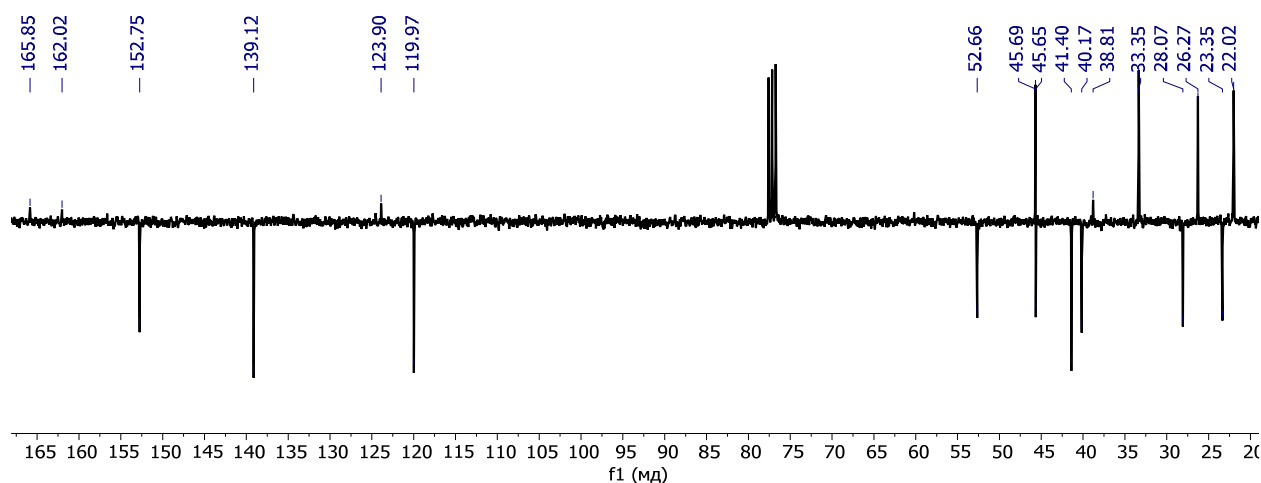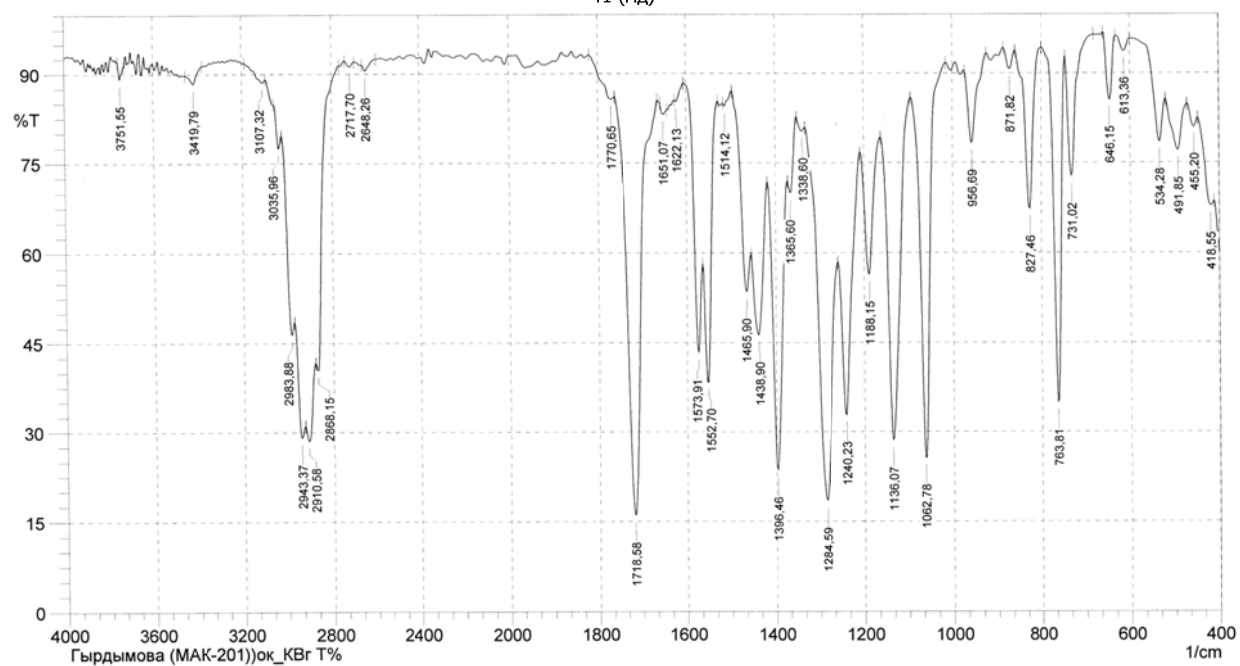



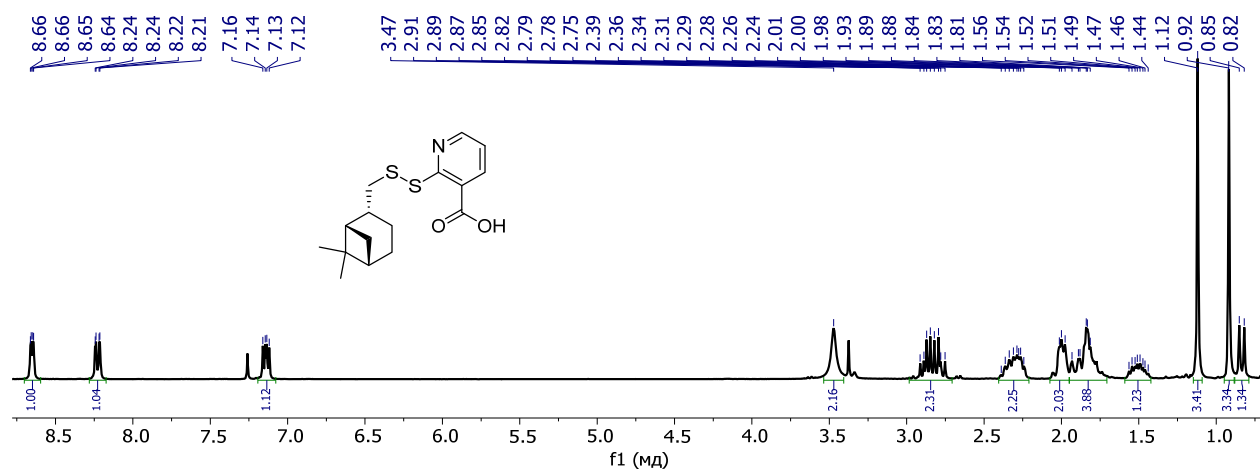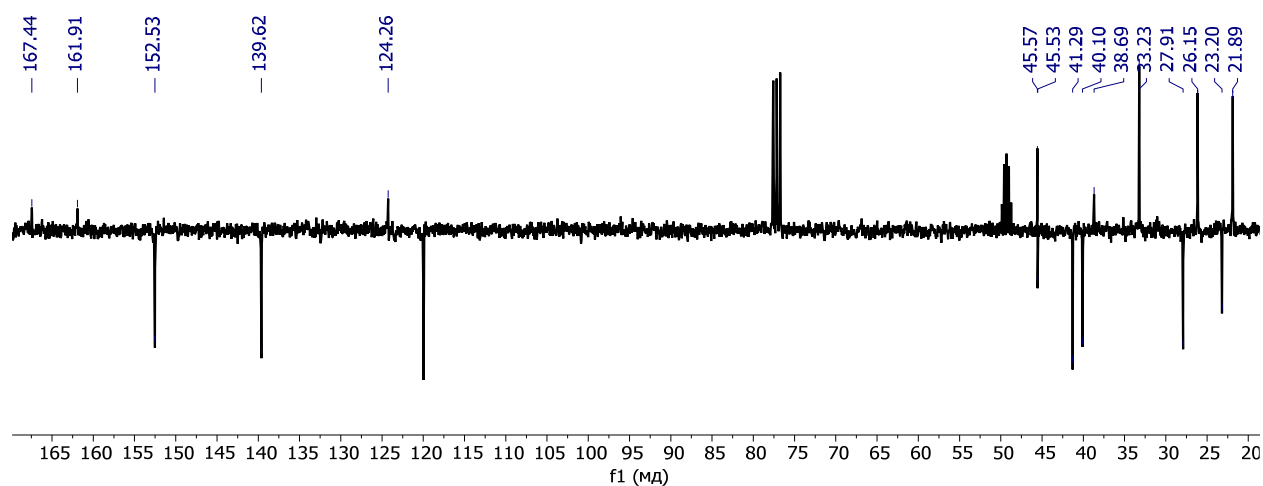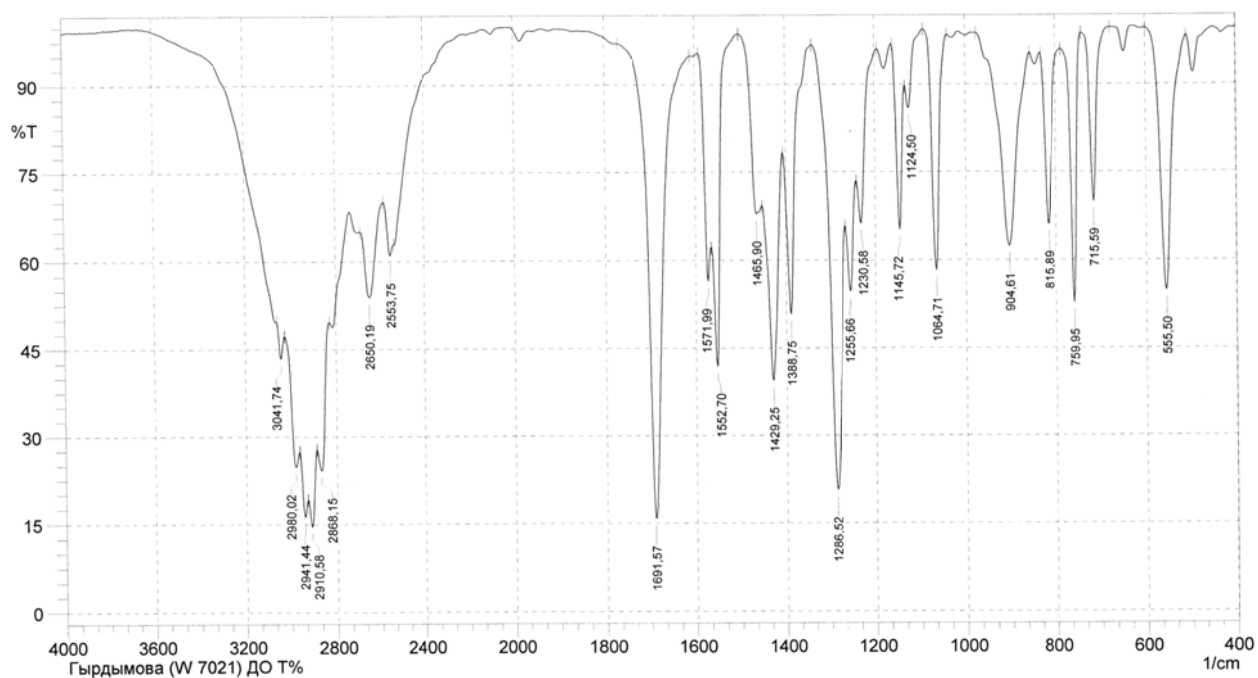

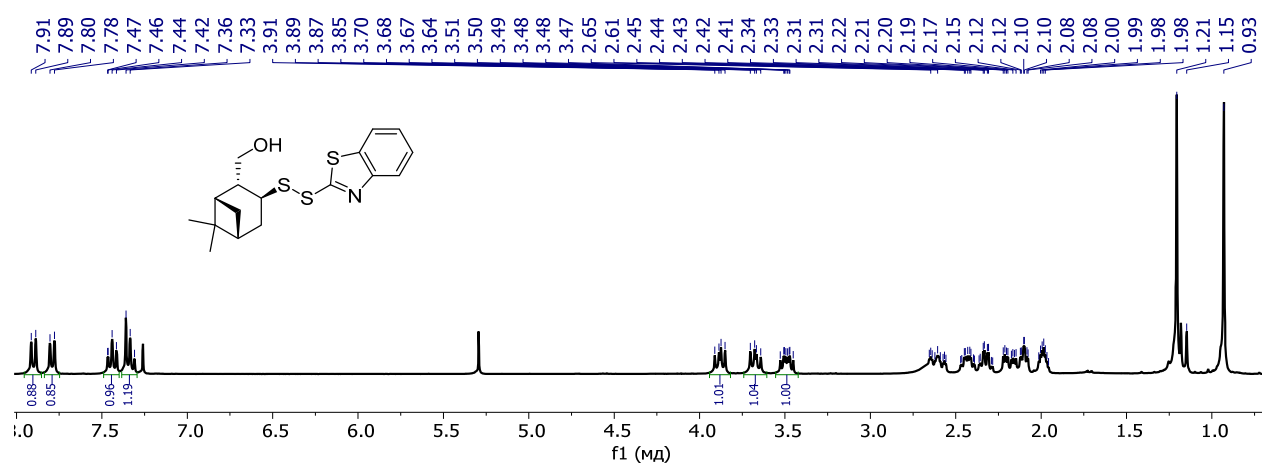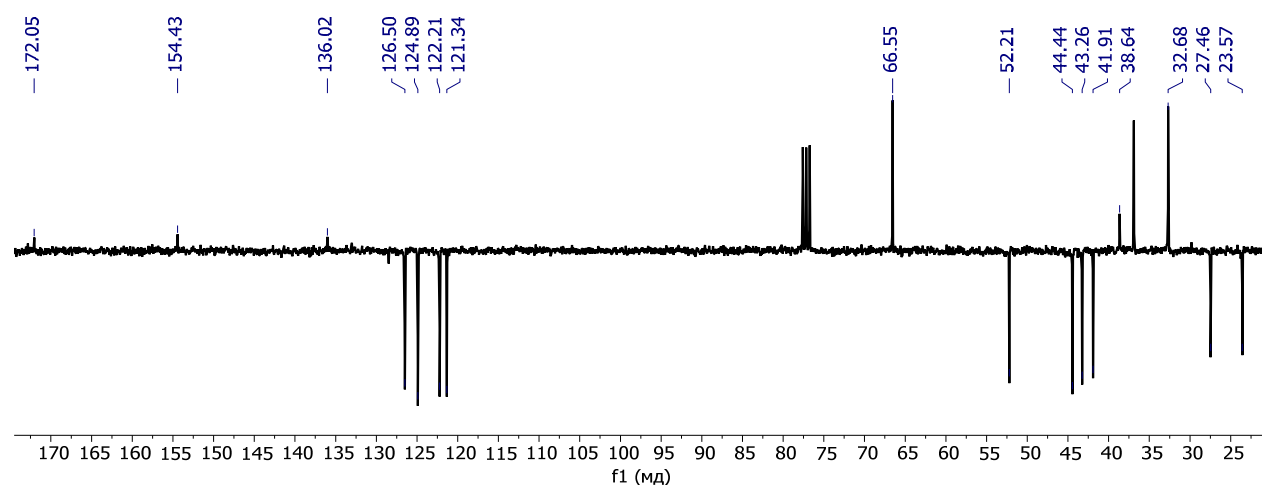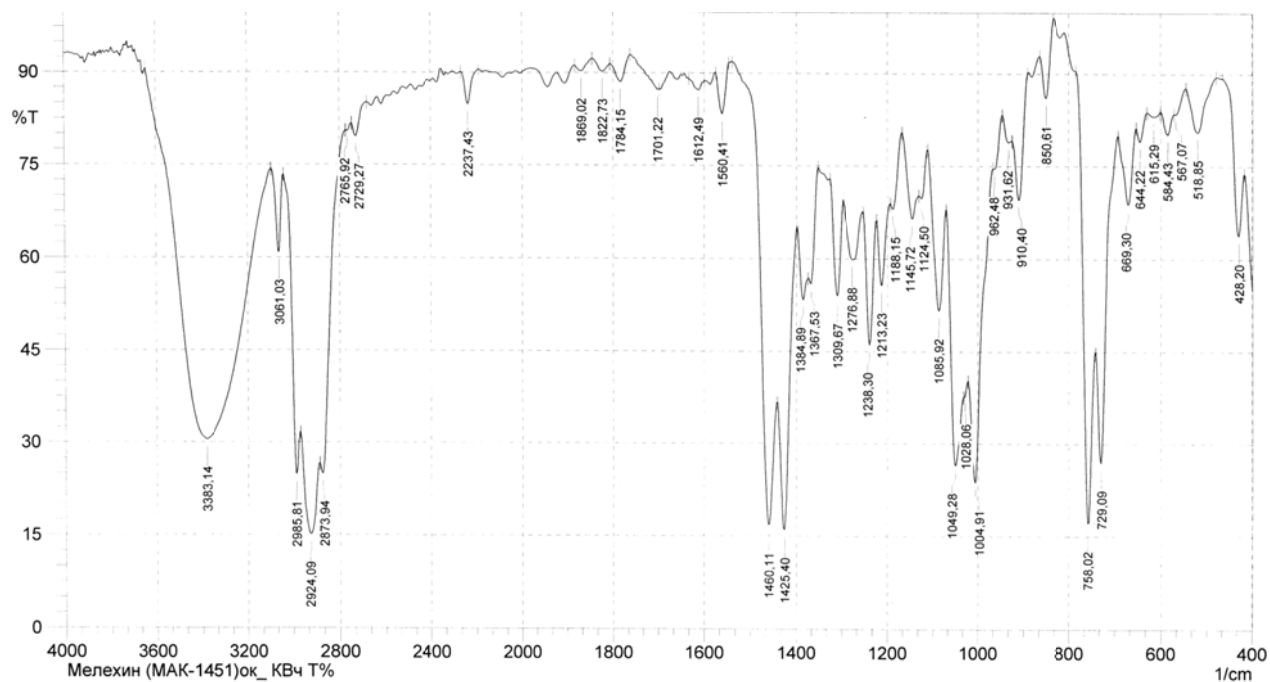

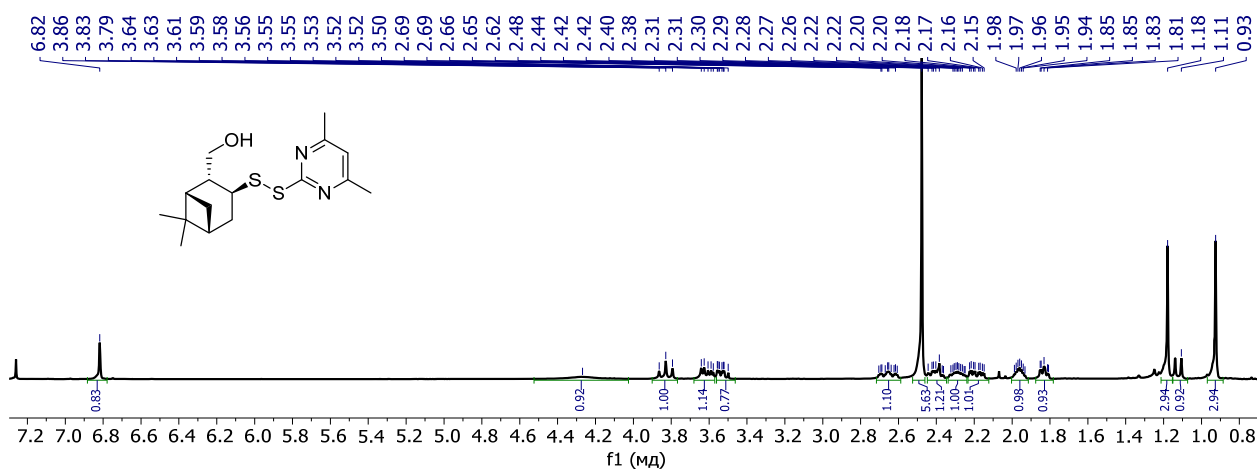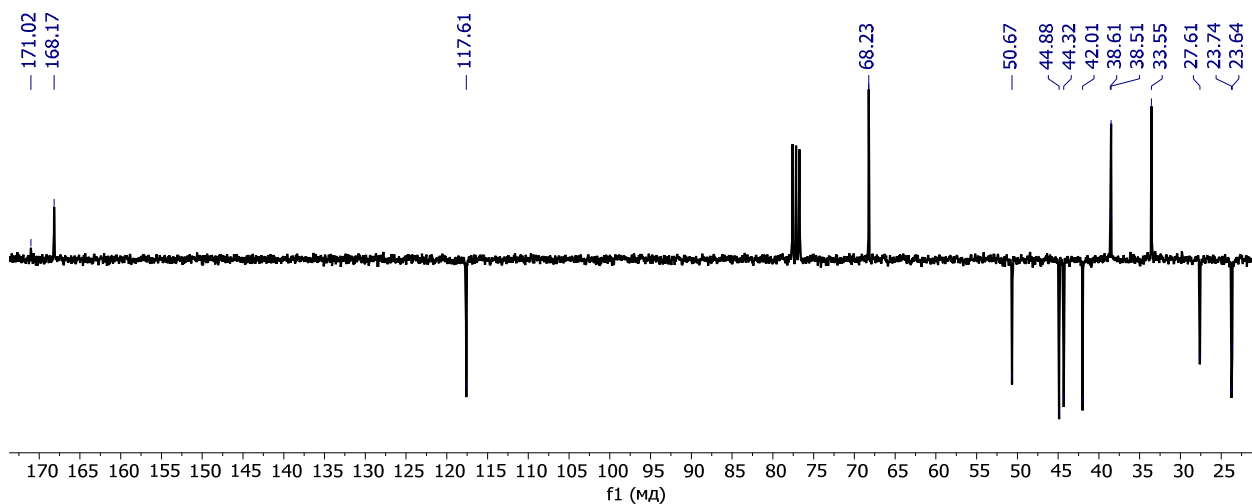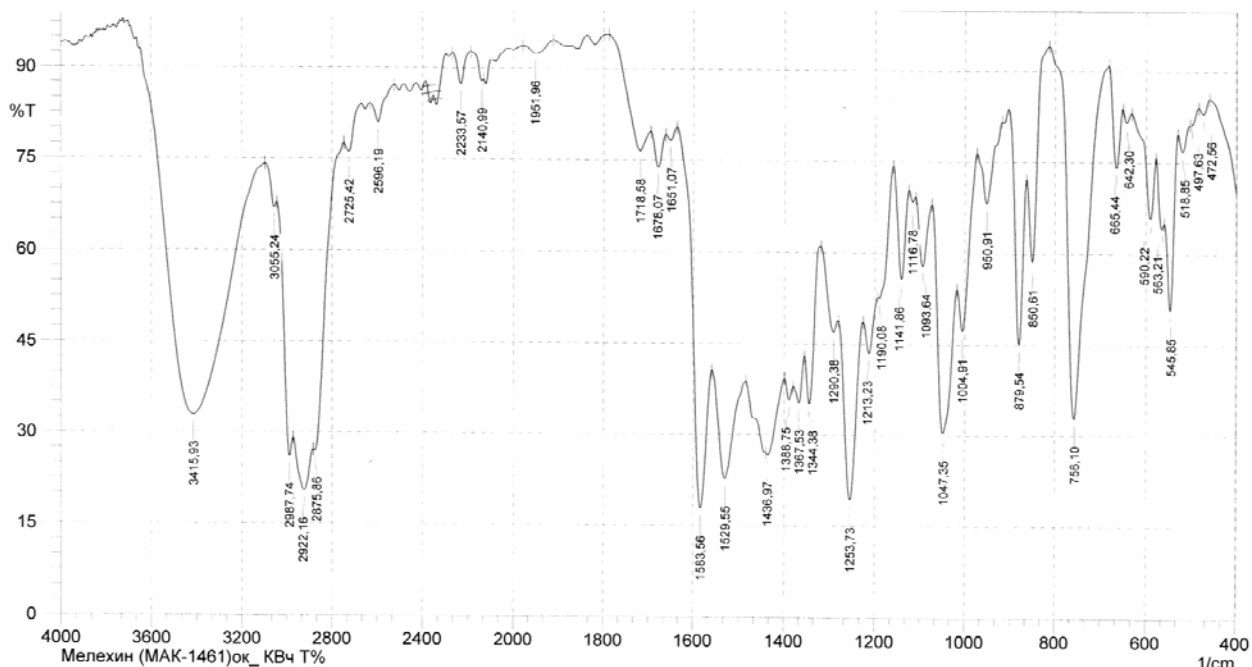

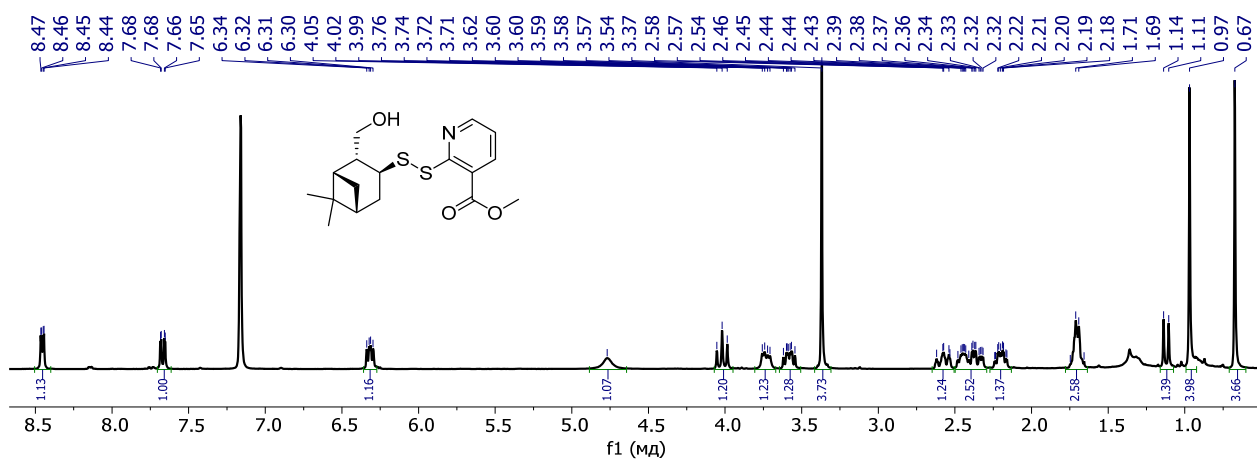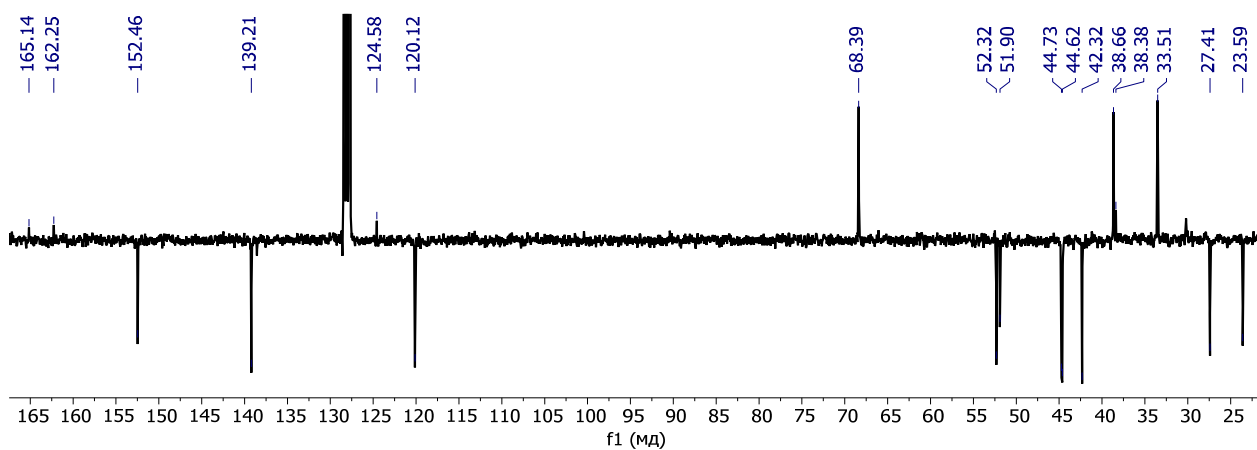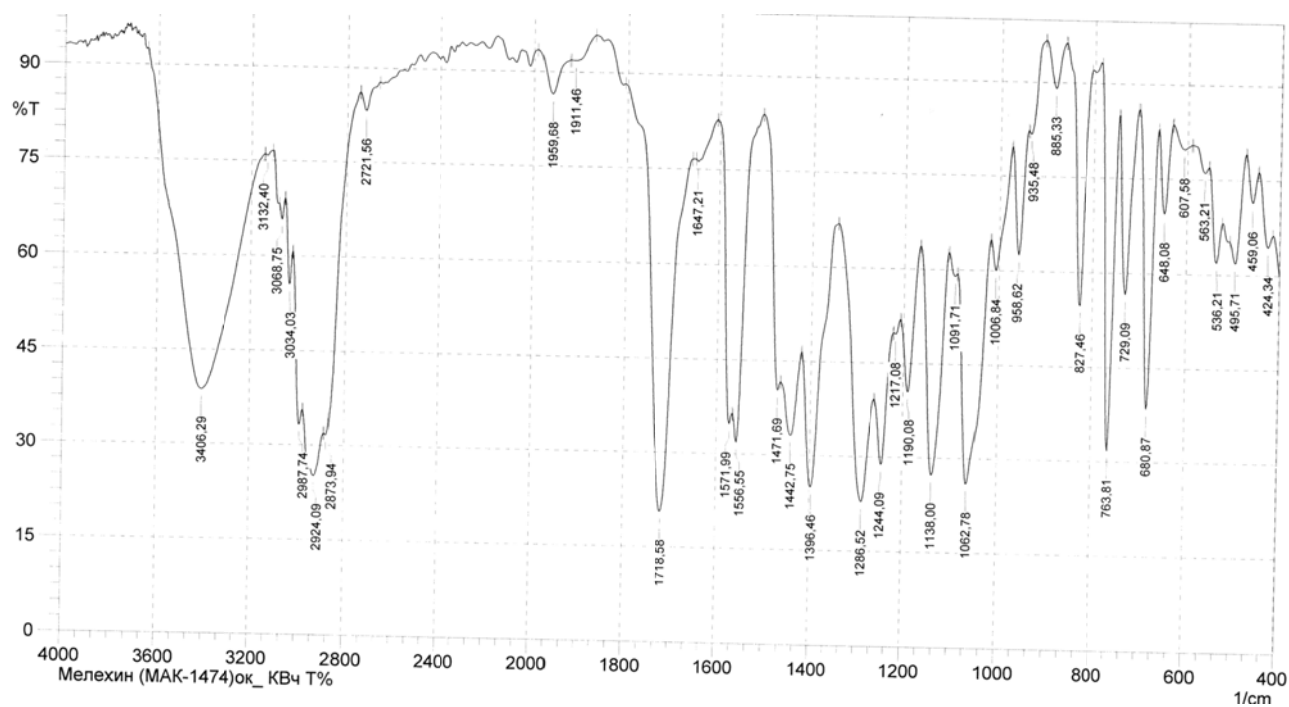

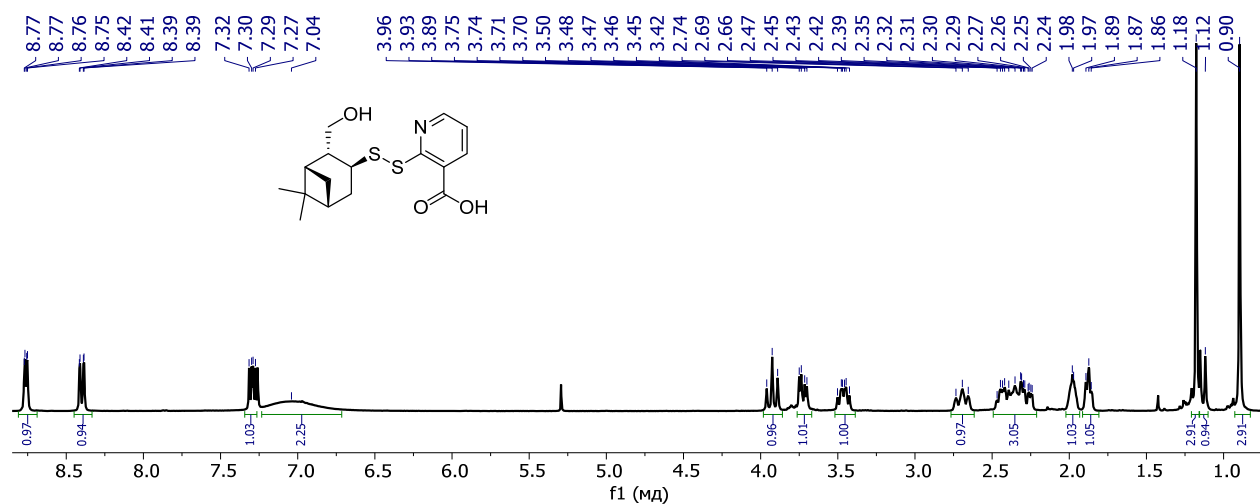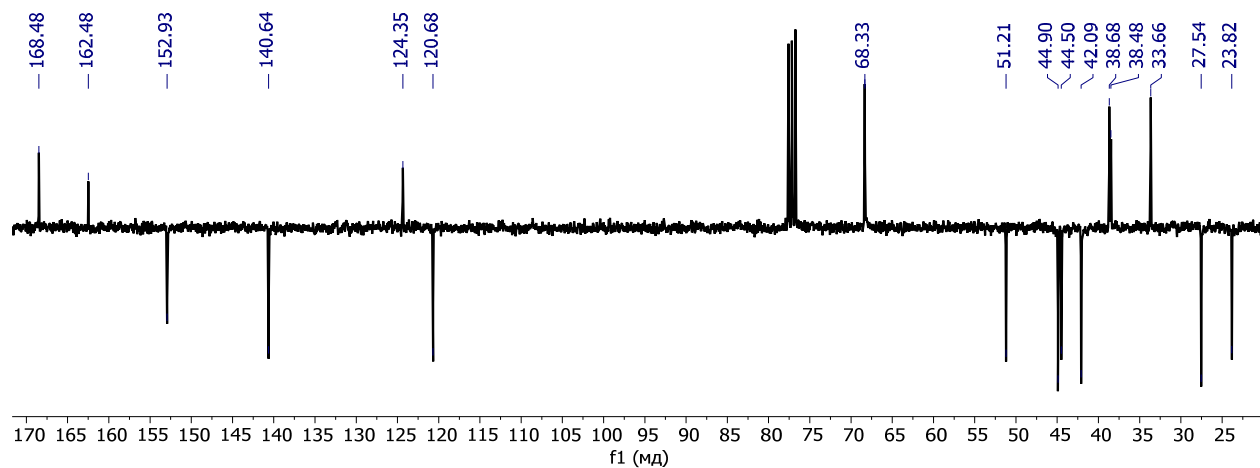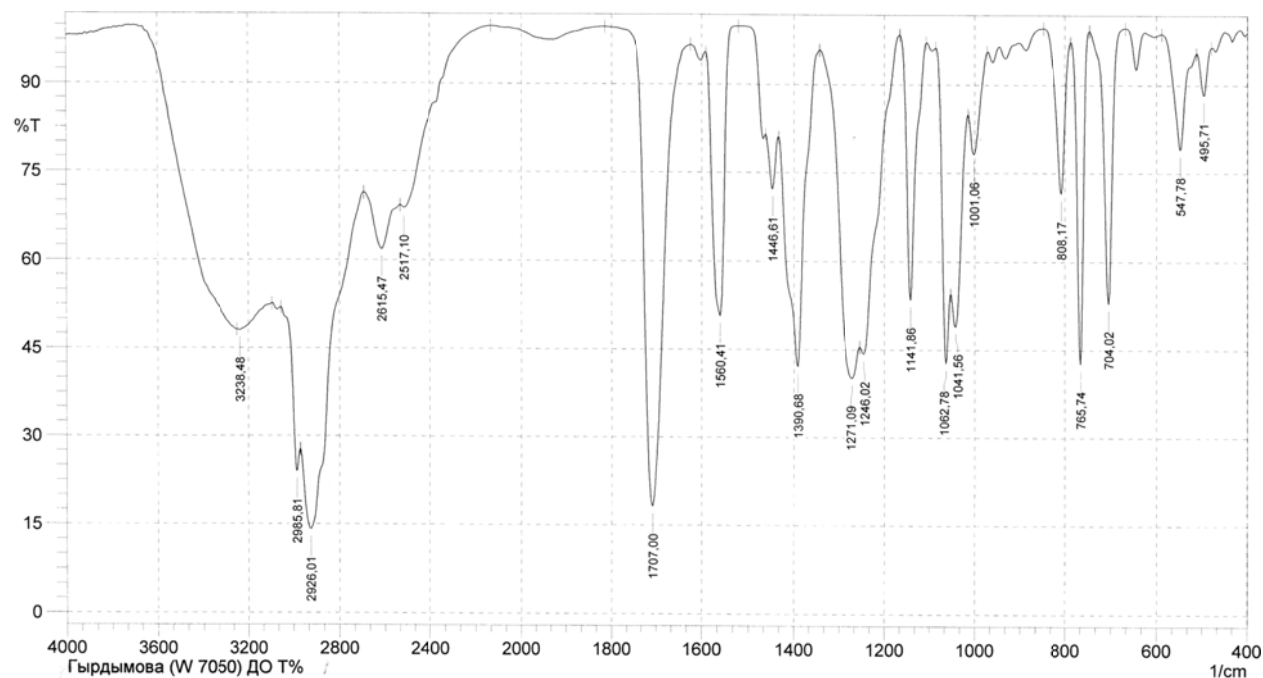

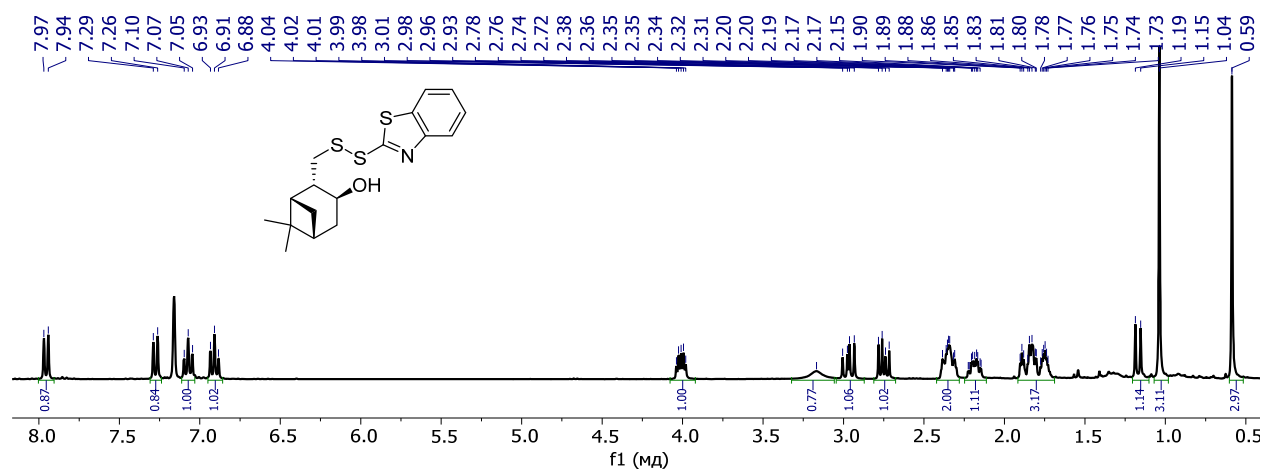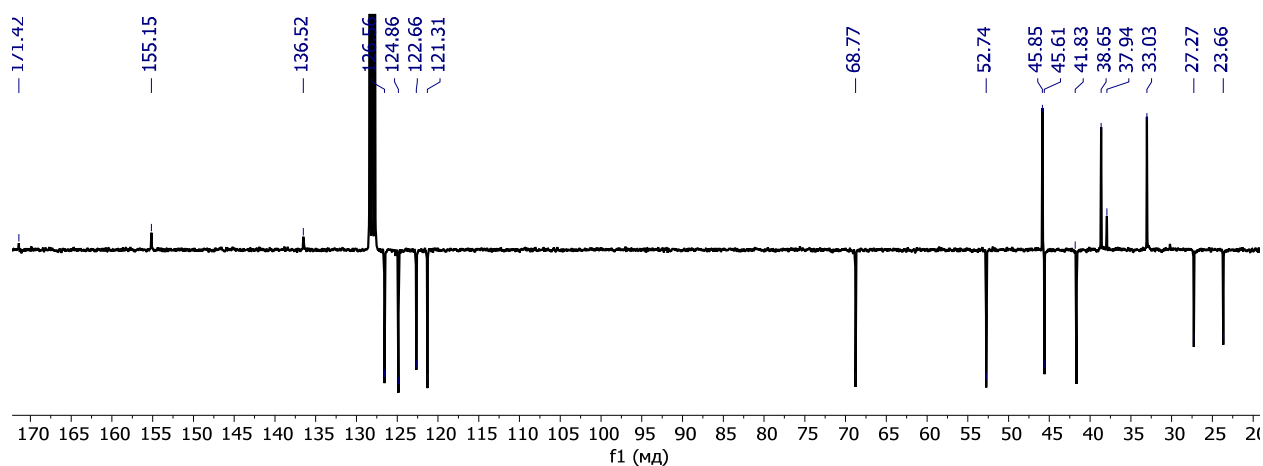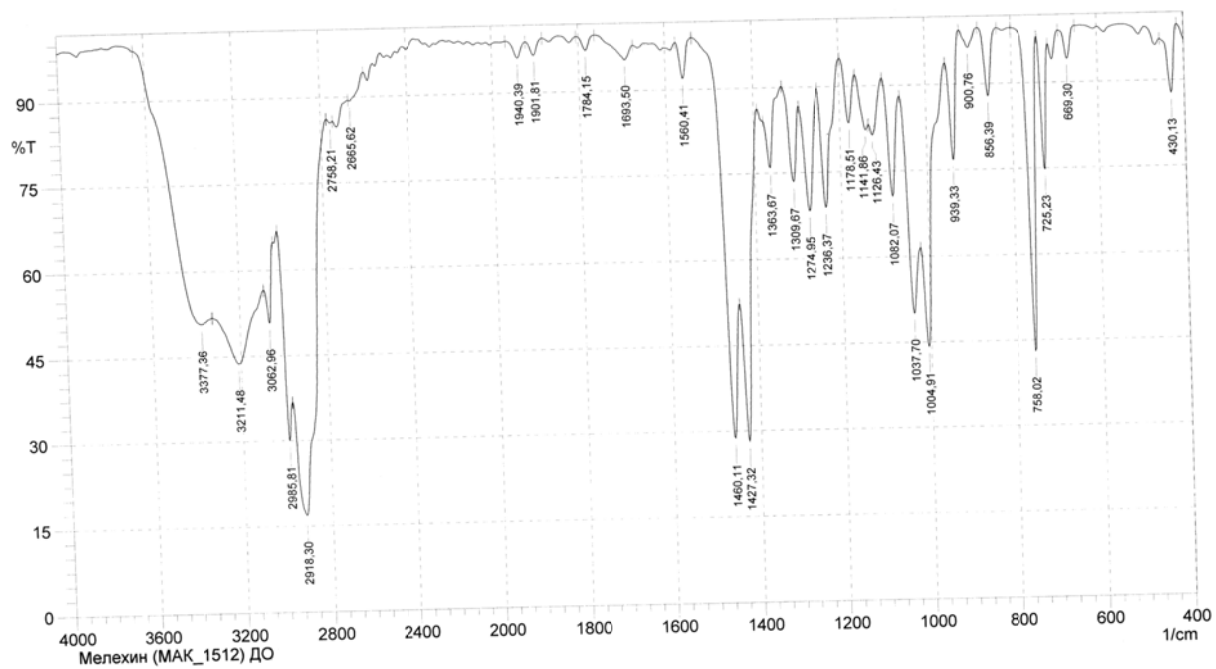

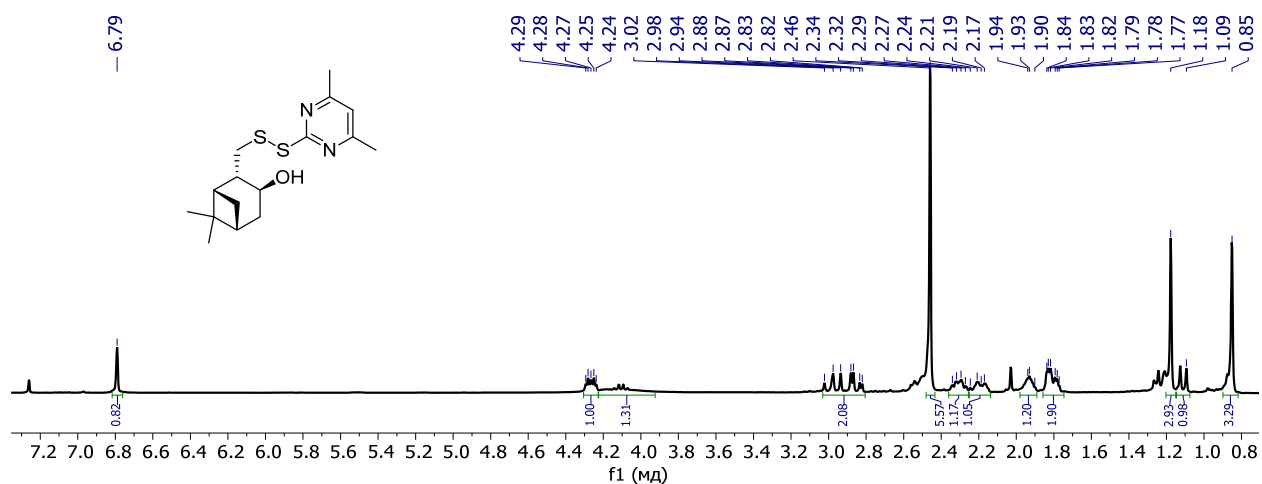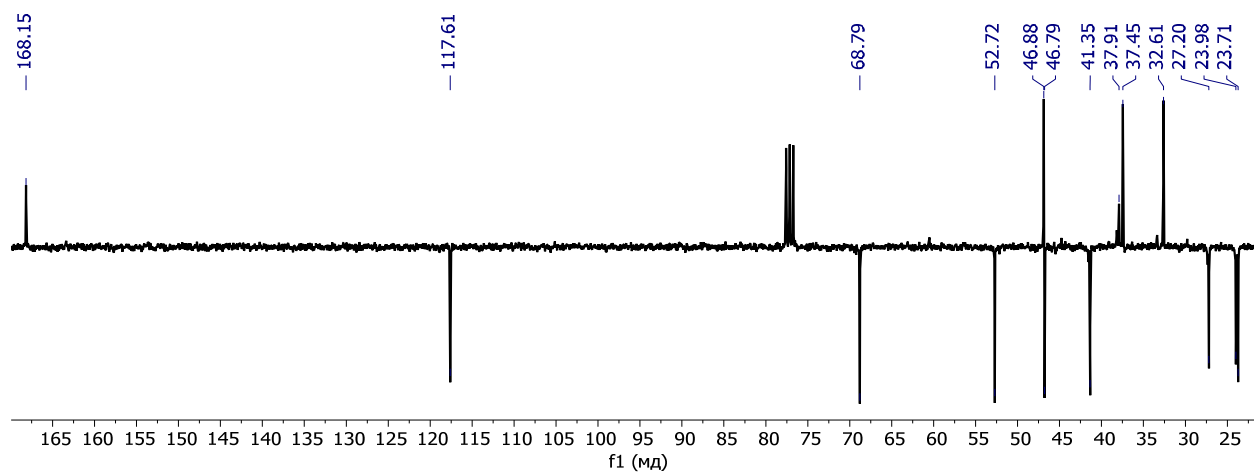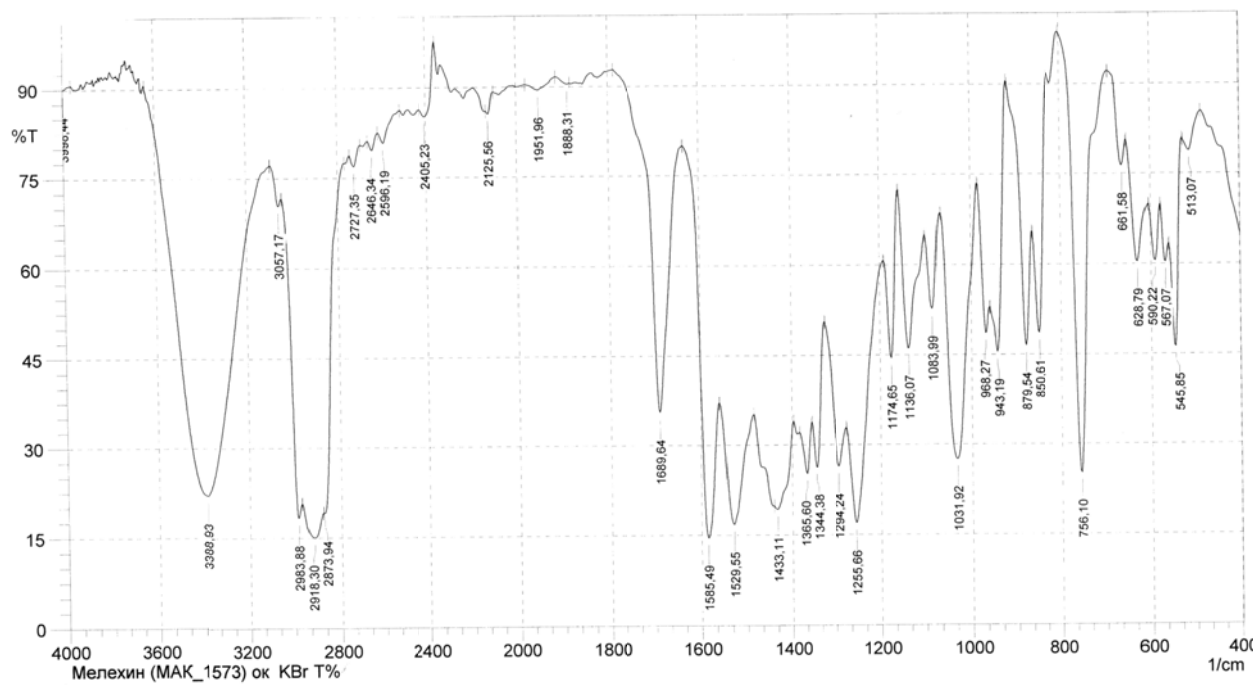

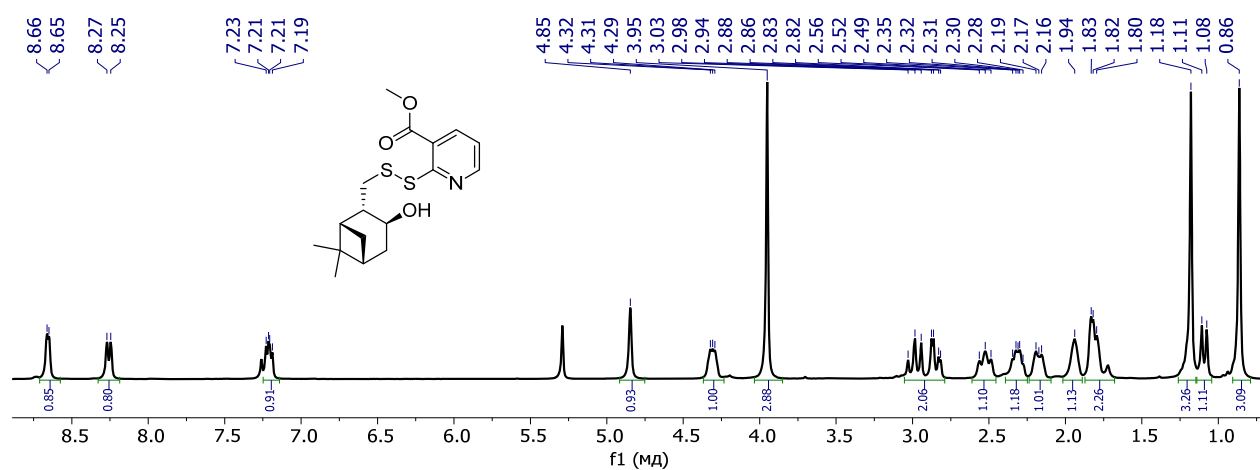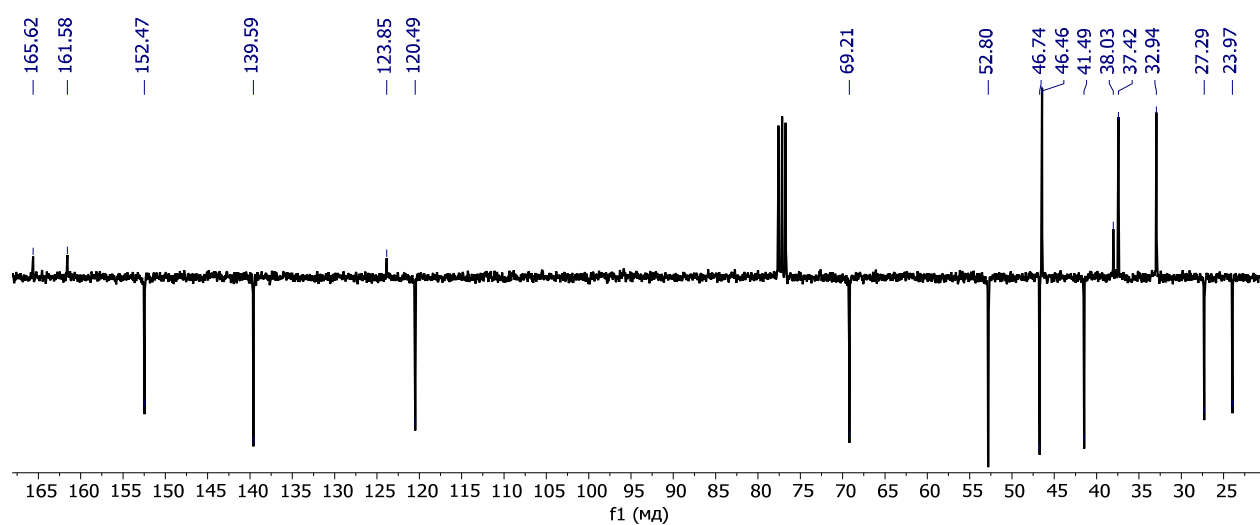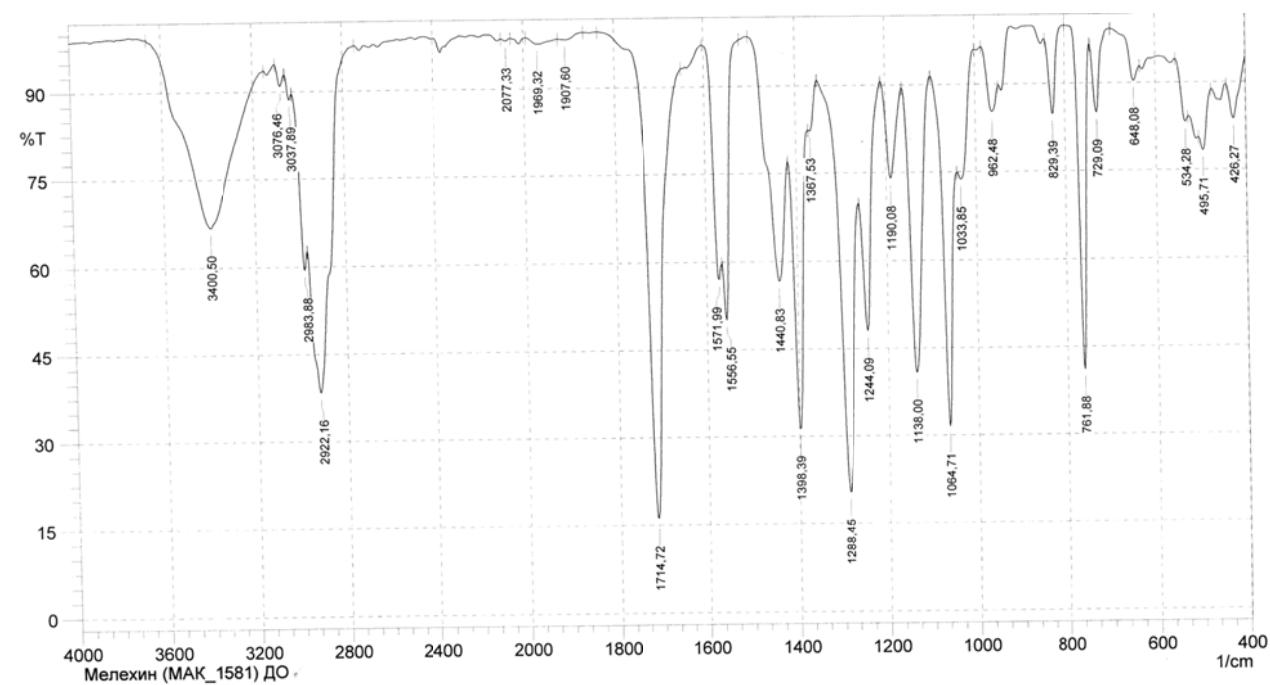



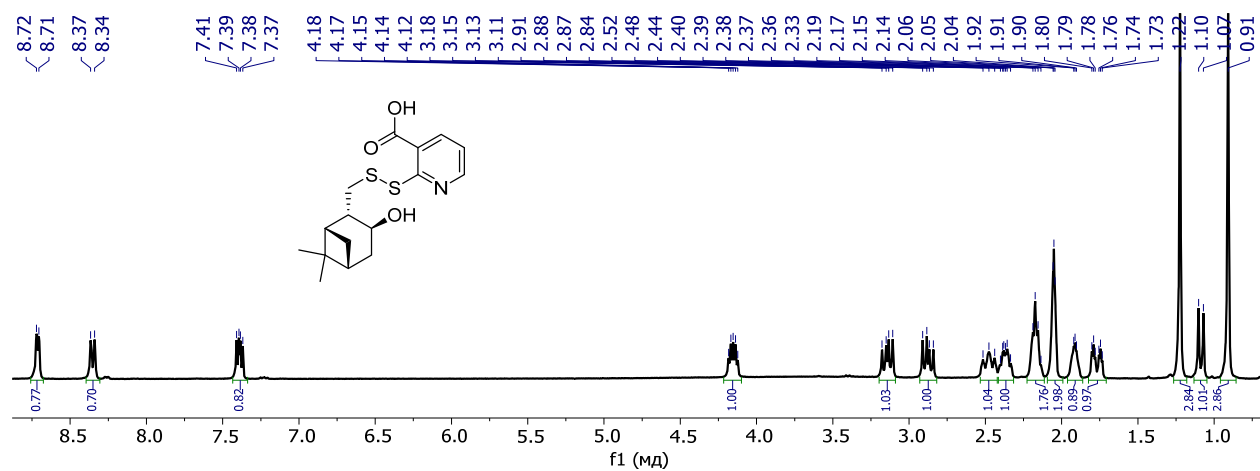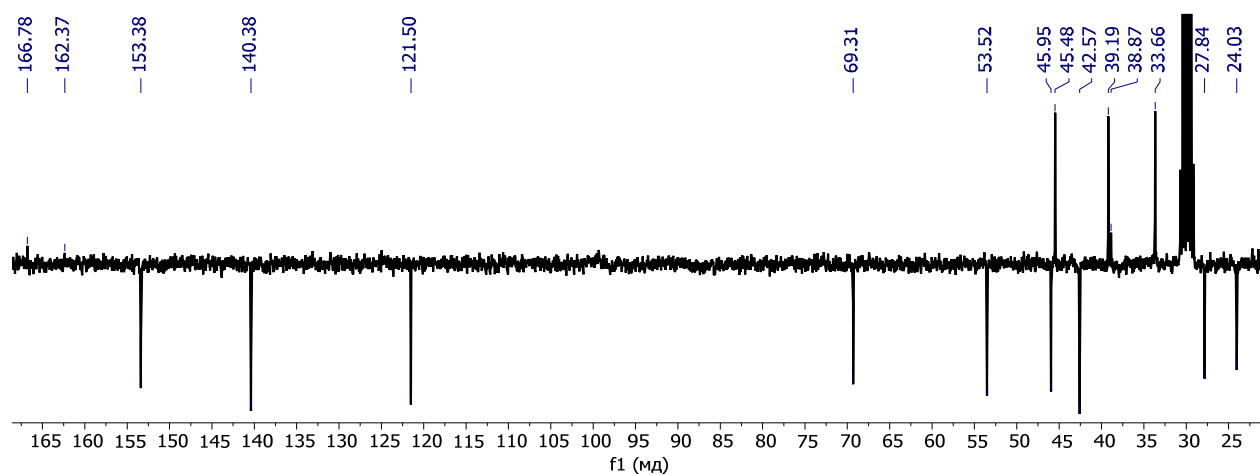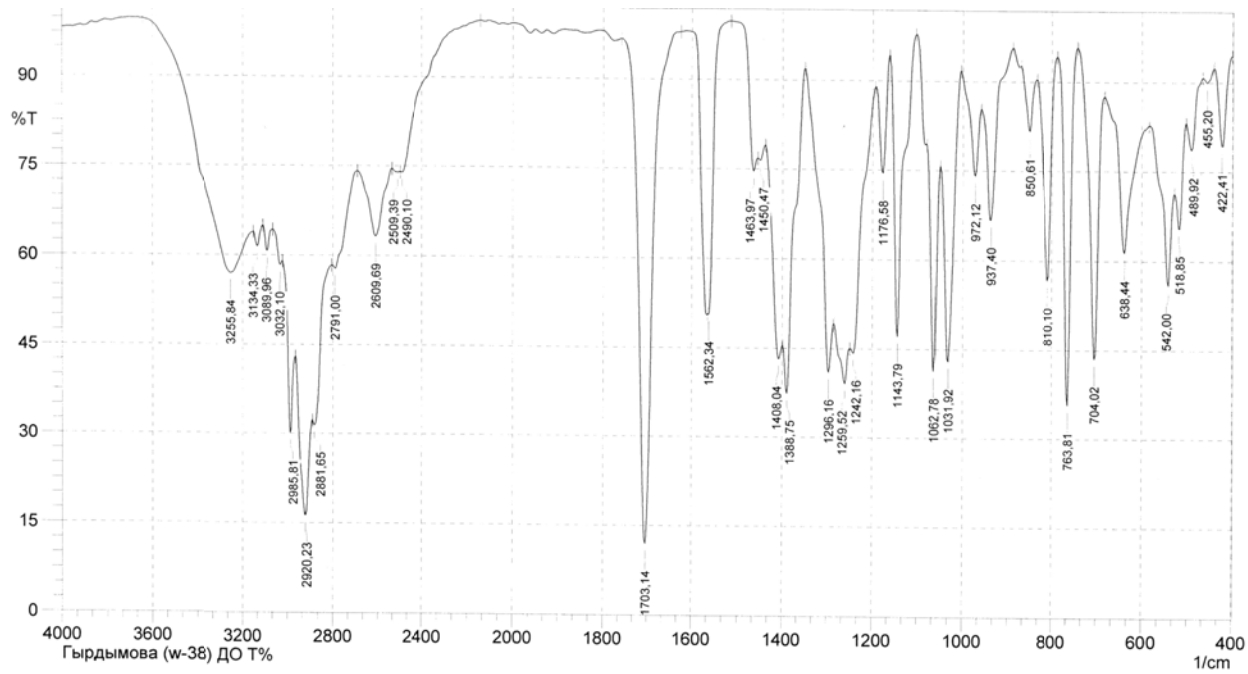

Supplement: s1 [file s1]
